Fig S1: Diurnal patterns of variation in (a) mean body temperature and (b) active body temperature of MF1 mice during baseline, mating and late pregnancy periods. The grey bar represents the period of darkness.

(a)

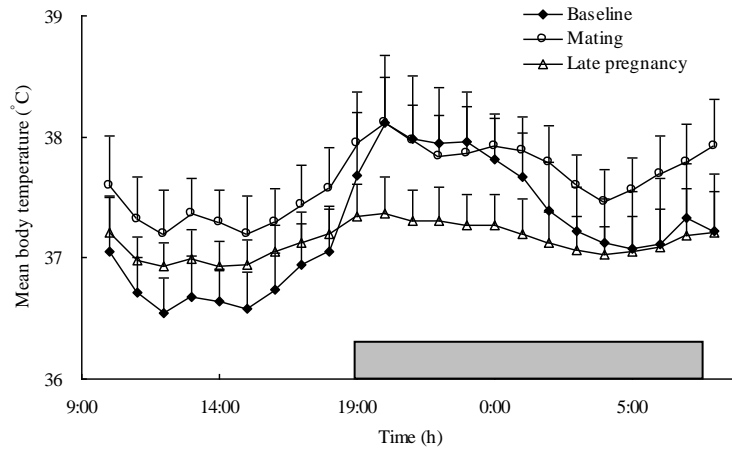

(b)

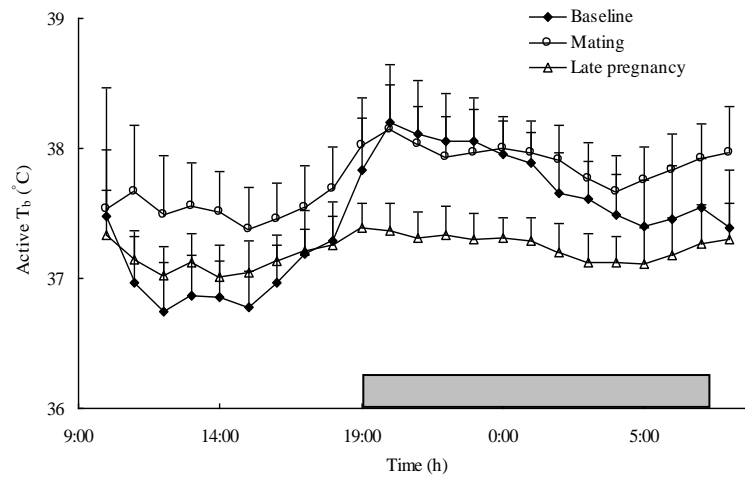

Supplementary Table 1 Energy intake and body mass changes from baseline to pregnancy.

|           | Day | Energy intake*<br>(kJ day <sup>-1</sup> ) (n) | Energy intake<br>(kJ day <sup>-1</sup> ) (n) | Body mass<br>(g) (n) |
|-----------|-----|-----------------------------------------------|----------------------------------------------|----------------------|
| Baseline  | -27 | 70.53 ± 10.73 (11)                            | 66.51 ± 10.65 (26)                           | 29.74 ± 1.72 (26)    |
|           | -26 | 63.07 ± 12.41 (11)                            | 63.71 ± 10.69 (26)                           | 30.05 ± 1.78 (26)    |
|           | -25 | 77.50 ± 19.42 (11)                            | 73.63 ± 15.04 (26)                           | 30.13 ± 1.65 (26)    |
|           | -24 | 81.95 ± 24.41 (11)                            | 72.44 ± 19.46 (26)                           | 30.39 ± 1.55 (26)    |
|           | -23 | 70.77 ± 16.74 (11)                            | 64.44 ± 13.90 (26)                           | 30.47 ± 1.52 (26)    |
|           | -22 | 72.45 ± 18.91 (11)                            | 66.22 ± 15.39 (26)                           | 30.59 ± 1.48 (26)    |
|           | -21 | 72.10 ± 11.92 (11)                            | 68.44 ± 13.12 (26)                           | 30.65 ± 1.56 (26)    |
| Mating    | -20 |                                               |                                              | 31.57 ± 1.29 (23)    |
|           | -19 |                                               |                                              | 31.72 ± 1.55 (26)    |
|           | -18 |                                               |                                              | 31.86 ± 1.48 (26)    |
|           | -17 |                                               |                                              | 32.16 ± 1.48 (26)    |
|           | -16 |                                               |                                              | 32.60 ± 1.57 (26)    |
| Pregnancy | -15 |                                               |                                              | 33.08 ± 1.56 (26)    |
|           | -14 |                                               |                                              | 33.48 ± 1.57 (26)    |
|           | -13 |                                               |                                              | 33.95 ± 1.67 (26)    |
|           | -12 | 89.49 ± 34.29 (11)                            | 89.49 ± 34.29 (11)                           | 34.50 ± 1.70 (26)    |
|           | -11 | 86.29 ± 21.53 (11)                            | 82.86 ± 21.55 (13)                           | 35.12 ± 1.84 (26)    |
|           | -10 | 91.67 ± 19.29 (11)                            | 86.40 ± 19.68 (16)                           | 35.92 ± 2.10 (26)    |
|           | -9  | 93.29 ± 20.38 (11)                            | 87.11 ± 18.98 (17)                           | 37.15 ± 2.00 (26)    |
|           | -8  | 88.49 ± 20.92 (11)                            | 80.03 ± 22.46 (18)                           | 38.84 ± 2.28 (26)    |
|           | -7  | 90.05 ± 18.93 (11)                            | 86.64 ± 16.16 (18)                           | 40.50 ± 2.41 (26)    |
|           | -6  | 104.51 ± 28.58 (11)                           | 94.42 ± 23.30 (22)                           | 42.49 ± 2.66 (26)    |
|           | -5  | 103.10 ± 31.26 (11)                           | 95.05 ± 25.21 (26)                           | 44.72 ± 3.15 (26)    |
|           | -4  | 109.62 ± 33.24 (11)                           | 96.26 ± 26.81 (26)                           | 47.38 ± 3.34 (26)    |
|           | -3  | 114.64 ± 26.17 (11)                           | 106.53 ± 23.35 (26)                          | 50.46 ± 3.83 (26)    |
|           | -2  | 107.49 ± 32.04 (11)                           | 98.27 ± 25.79 (26)                           | 53.62 ± 4.49 (26)    |
| -1        |     | 69.65 ± 18.67 (10)                            | 56.47 ± 4.87 (26)                            |                      |

Days are counted backward from the day of parturition (Day 0=parturition). Energy intake is not shown during a mating period when a male was housed together with a female. Energy intake and body mass are expressed as means ± s.d. across the sample sizes shown in this table. \*Energy intakes are calculated from the same 11 mice in baseline and pregnancy after Day -12.

Supplementary Table 2 Daily activity counts, mean T<sub>b</sub>, active T<sub>b</sub> and Inactive T<sub>b</sub>.

|           | Day          | Activity     | Mean T <sub>b</sub> | Active T <sub>b</sub> | Inactive T <sub>b</sub> | Sample size |
|-----------|--------------|--------------|---------------------|-----------------------|-------------------------|-------------|
| Baseline  | -27          | 22.24 ± 8.10 | 37.22 ± 0.26        | 37.57 ± 0.24          | 36.64 ± 0.37            | 26          |
|           | -26          | 23.15 ± 8.96 | 37.21 ± 0.28        | 37.59 ± 0.25          | 36.59 ± 0.36            | 26          |
|           | -25          | 21.28 ± 7.84 | 37.30 ± 0.25        | 37.67 ± 0.22          | 36.67 ± 0.35            | 26          |
|           | -24          | 22.19 ± 9.06 | 37.23 ± 0.26        | 37.63 ± 0.25          | 36.60 ± 0.30            | 26          |
|           | -23          | 22.53 ± 9.76 | 37.27 ± 0.32        | 37.67 ± 0.23          | 36.61 ± 0.42            | 26          |
|           | -22          | 21.59 ± 9.55 | 37.24 ± 0.27        | 37.66 ± 0.21          | 36.54 ± 0.37            | 26          |
|           | -21          | 30.00 ± 9.26 | 37.24 ± 0.26        | 37.66 ± 0.22          | 36.57 ± 0.28            | 26          |
| Mating    | -20          | 23.70 ± 7.63 | 37.69 ± 0.25        | 37.90 ± 0.23          | 36.93 ± 0.41            | 23          |
|           | -19          | 23.02 ± 7.62 | 37.56 ± 0.24        | 37.78 ± 0.25          | 37.01 ± 0.29            | 26          |
|           | -18          | 22.30 ± 7.07 | 37.61 ± 0.21        | 37.83 ± 0.21          | 37.15 ± 0.28            | 26          |
|           | -17          | 22.74 ± 6.74 | 37.51 ± 0.19        | 37.74 ± 0.21          | 36.96 ± 0.43            | 26          |
|           | -16          | 22.34 ± 6.23 | 37.69 ± 0.20        | 37.87 ± 0.20          | 37.33 ± 0.29            | 26          |
| Pregnancy | -15          | 22.74 ± 6.15 | 37.74 ± 0.22        | 37.93 ± 0.20          | 37.41 ± 0.28            | 14          |
|           | -14          | 23.19 ± 6.39 | 37.76 ± 0.19        | 37.91 ± 0.20          | 37.46 ± 0.23            | 26          |
|           | -13          | 21.89 ± 6.24 | 37.77 ± 0.18        | 37.92 ± 0.20          | 37.45 ± 0.22            | 26          |
|           | -12          | 21.80 ± 7.80 | 37.76 ± 0.18        | 37.92 ± 0.19          | 37.46 ± 0.21            | 26          |
|           | -11          | 19.77 ± 6.83 | 37.70 ± 0.20        | 37.87 ± 0.21          | 37.39 ± 0.22            | 26          |
|           | -10          | 18.46 ± 6.22 | 37.59 ± 0.22        | 37.75 ± 0.25          | 37.31 ± 0.22            | 26          |
|           | -9           | 17.99 ± 5.08 | 37.53 ± 0.17        | 37.66 ± 0.19          | 37.29 ± 0.17            | 26          |
|           | -8           | 16.27 ± 3.98 | 37.47 ± 0.16        | 37.59 ± 0.19          | 37.25 ± 0.18            | 26          |
|           | -7           | 14.33 ± 3.64 | 37.37 ± 0.19        | 37.49 ± 0.19          | 37.15 ± 0.22            | 26          |
|           | -6           | 12.81 ± 4.37 | 37.28 ± 0.18        | 37.39 ± 0.19          | 37.08 ± 0.21            | 26          |
|           | -5           | 10.51 ± 3.37 | 37.16 ± 0.20        | 37.29 ± 0.21          | 36.98 ± 0.21            | 26          |
|           | -4           | 8.89 ± 2.61  | 37.00 ± 0.21        | 37.11 ± 0.22          | 36.84 ± 0.23            | 26          |
|           | -3           | 8.10 ± 2.72  | 36.86 ± 0.21        | 36.98 ± 0.22          | 36.71 ± 0.23            | 26          |
| -2        | 11.05 ± 5.44 | 36.78 ± 0.21 | 36.89 ± 0.21        | 36.66 ± 0.26          | 26                      |             |
| -1        | 22.24 ± 8.10 | 36.97 ± 0.35 | 37.10 ± 0.36        | 36.72 ± 0.37          | 26                      |             |

The data are expressed as means ± s.d. Sample size varies depending on the day shown in this table.

Supplementary Table 3 Activity changes over the day during baseline, mating and late pregnancy.

| Time (h) | Baseline (n)       | Mating (n)         | Late pregnancy (n) |
|----------|--------------------|--------------------|--------------------|
| 10       | 11.12 ± 9.76 (26)  | 17.54 ± 9.54 (26)  | 8.86 ± 4.60 (26)   |
| 11       | 6.78 ± 5.29 (26)   | 12.19 ± 5.91 (26)  | 5.18 ± 2.64 (26)   |
| 12       | 5.39 ± 2.98 (26)   | 9.57 ± 6.03 (26)   | 5.15 ± 2.57 (26)   |
| 13       | 7.34 ± 4.65 (26)   | 13.44 ± 7.45 (26)  | 6.32 ± 4.21 (26)   |
| 14       | 4.90 ± 2.40 (26)   | 10.93 ± 5.94 (26)  | 5.18 ± 2.89 (26)   |
| 15       | 5.14 ± 2.57 (26)   | 8.25 ± 4.17 (26)   | 6.68 ± 3.64 (26)   |
| 16       | 9.00 ± 4.27 (26)   | 11.80 ± 7.63 (26)  | 10.97 ± 5.20 (26)  |
| 17       | 12.82 ± 10.98 (26) | 16.55 ± 11.74 (26) | 12.96 ± 8.42 (26)  |
| 18       | 13.24 ± 11.05 (26) | 19.95 ± 13.47 (26) | 15.46 ± 7.96 (26)  |
| 19       | 40.07 ± 27.27 (26) | 43.47 ± 23.82 (26) | 23.60 ± 9.98 (26)  |
| 20       | 58.47 ± 33.54 (26) | 53.68 ± 21.83 (26) | 23.40 ± 9.25 (26)  |
| 21       | 48.85 ± 33.52 (26) | 38.40 ± 17.95 (26) | 18.32 ± 8.42 (26)  |
| 22       | 44.57 ± 27.75 (26) | 31.23 ± 14.11 (26) | 15.43 ± 5.52 (26)  |
| 23       | 42.95 ± 22.94 (26) | 31.83 ± 14.28 (26) | 17.15 ± 6.00 (26)  |
| 0        | 38.43 ± 19.21 (26) | 36.21 ± 14.84 (26) | 17.40 ± 7.16 (26)  |
| 1        | 32.48 ± 15.67 (26) | 34.53 ± 16.20 (26) | 14.57 ± 6.14 (26)  |
| 2        | 22.47 ± 11.34 (26) | 29.72 ± 15.04 (26) | 12.17 ± 5.03 (26)  |
| 3        | 17.23 ± 8.83 (26)  | 19.32 ± 12.71 (26) | 10.58 ± 4.88 (26)  |
| 4        | 17.88 ± 9.68 (26)  | 15.04 ± 11.00 (26) | 9.66 ± 5.17 (26)   |
| 5        | 17.54 ± 10.17 (26) | 18.53 ± 9.60 (26)  | 10.83 ± 7.08 (26)  |
| 6        | 16.79 ± 8.54 (26)  | 25.98 ± 14.78 (26) | 12.21 ± 6.91 (26)  |
| 7        | 20.16 ± 7.26 (26)  | 28.08 ± 12.59 (26) | 14.27 ± 7.32 (26)  |
| 8        | 16.79 ± 9.83 (26)  | 33.06 ± 14.27 (26) | 13.82 ± 5.07 (26)  |

The data are expressed as means ± s.d.

Supplementary Table 4. Mean  $T_b$  changes of a day during baseline, mating and late pregnancy.

| Time (h) | Baseline (n)      | Mating (n)        | Late pregnancy (n) |
|----------|-------------------|-------------------|--------------------|
| 10       | 37.05 ± 0.45 (26) | 37.60 ± 0.41 (26) | 37.21 ± 0.30 (26)  |
| 11       | 36.71 ± 0.29 (26) | 37.32 ± 0.34 (26) | 36.98 ± 0.19 (26)  |
| 12       | 36.55 ± 0.29 (26) | 37.20 ± 0.37 (26) | 36.93 ± 0.19 (26)  |
| 13       | 36.68 ± 0.34 (26) | 37.36 ± 0.29 (26) | 36.99 ± 0.24 (26)  |
| 14       | 36.64 ± 0.27 (26) | 37.29 ± 0.27 (26) | 36.94 ± 0.20 (26)  |
| 15       | 36.58 ± 0.30 (26) | 37.20 ± 0.32 (26) | 36.94 ± 0.21 (26)  |
| 16       | 36.73 ± 0.31 (26) | 37.29 ± 0.28 (26) | 37.05 ± 0.21 (26)  |
| 17       | 36.94 ± 0.34 (26) | 37.44 ± 0.32 (26) | 37.13 ± 0.25 (26)  |
| 18       | 37.06 ± 0.34 (26) | 37.58 ± 0.34 (26) | 37.20 ± 0.23 (26)  |
| 19       | 37.68 ± 0.52 (26) | 37.95 ± 0.42 (26) | 37.34 ± 0.27 (26)  |
| 20       | 38.11 ± 0.55 (26) | 38.11 ± 0.38 (26) | 37.37 ± 0.30 (26)  |
| 21       | 37.98 ± 0.53 (26) | 37.97 ± 0.30 (26) | 37.31 ± 0.25 (26)  |
| 22       | 37.94 ± 0.46 (26) | 37.84 ± 0.33 (26) | 37.31 ± 0.27 (26)  |
| 23       | 37.95 ± 0.41 (26) | 37.87 ± 0.39 (26) | 37.27 ± 0.25 (26)  |
| 0        | 37.81 ± 0.35 (26) | 37.93 ± 0.26 (26) | 37.27 ± 0.25 (26)  |
| 1        | 37.67 ± 0.36 (26) | 37.88 ± 0.28 (26) | 37.20 ± 0.29 (26)  |
| 2        | 37.40 ± 0.39 (26) | 37.79 ± 0.30 (26) | 37.13 ± 0.25 (26)  |
| 3        | 37.22 ± 0.36 (26) | 37.59 ± 0.26 (26) | 37.07 ± 0.27 (26)  |
| 4        | 37.13 ± 0.36 (26) | 37.47 ± 0.26 (26) | 37.02 ± 0.24 (26)  |
| 5        | 37.08 ± 0.46 (26) | 37.56 ± 0.27 (26) | 37.05 ± 0.29 (26)  |
| 6        | 37.12 ± 0.53 (26) | 37.69 ± 0.32 (26) | 37.08 ± 0.32 (26)  |
| 7        | 37.33 ± 0.45 (26) | 37.79 ± 0.31 (26) | 37.19 ± 0.38 (26)  |
| 8        | 37.22 ± 0.47 (26) | 37.93 ± 0.38 (26) | 37.21 ± 0.34 (26)  |

The data are expressed as means ± s.d. Sample sizes (n) are all 26 as shown in this table.

Supplementary Table 5. Active T<sub>b</sub> changes of a day during baseline, mating and late pregnancy.

| Time (h) | Baseline (n)      | Mating (n)        | Late pregnancy (n) |
|----------|-------------------|-------------------|--------------------|
| 10       | 37.48 ± 0.51 (26) | 37.54 ± 0.93 (26) | 37.33 ± 0.34 (26)  |
| 11       | 36.96 ± 0.36 (26) | 37.66 ± 0.51 (26) | 37.14 ± 0.23 (26)  |
| 12       | 36.75 ± 0.38 (26) | 37.49 ± 0.46 (26) | 37.02 ± 0.23 (26)  |
| 13       | 36.87 ± 0.32 (26) | 37.55 ± 0.33 (26) | 37.12 ± 0.22 (26)  |
| 14       | 36.85 ± 0.28 (26) | 37.52 ± 0.31 (26) | 37.02 ± 0.24 (26)  |
| 15       | 36.78 ± 0.28 (26) | 37.38 ± 0.32 (26) | 37.04 ± 0.24 (26)  |
| 16       | 36.96 ± 0.30 (26) | 37.46 ± 0.28 (26) | 37.13 ± 0.20 (26)  |
| 17       | 37.19 ± 0.33 (26) | 37.55 ± 0.32 (26) | 37.21 ± 0.17 (26)  |
| 18       | 37.29 ± 0.30 (26) | 37.68 ± 0.33 (26) | 37.26 ± 0.22 (26)  |
| 19       | 37.83 ± 0.40 (26) | 38.03 ± 0.36 (26) | 37.39 ± 0.19 (26)  |
| 20       | 38.20 ± 0.44 (26) | 38.15 ± 0.34 (26) | 37.36 ± 0.21 (26)  |
| 21       | 38.11 ± 0.40 (26) | 38.03 ± 0.29 (26) | 37.32 ± 0.19 (26)  |
| 22       | 38.05 ± 0.37 (26) | 37.94 ± 0.31 (26) | 37.33 ± 0.23 (26)  |
| 23       | 38.06 ± 0.33 (26) | 37.97 ± 0.33 (26) | 37.30 ± 0.20 (26)  |
| 0        | 37.96 ± 0.28 (26) | 38.00 ± 0.21 (26) | 37.31 ± 0.16 (26)  |
| 1        | 37.89 ± 0.24 (26) | 37.97 ± 0.24 (26) | 37.29 ± 0.18 (26)  |
| 2        | 37.66 ± 0.31 (26) | 37.91 ± 0.26 (26) | 37.20 ± 0.22 (26)  |
| 3        | 37.61 ± 0.29 (26) | 37.77 ± 0.27 (26) | 37.12 ± 0.22 (26)  |
| 4        | 37.48 ± 0.32 (26) | 37.67 ± 0.27 (26) | 37.13 ± 0.20 (26)  |
| 5        | 37.40 ± 0.35 (26) | 37.75 ± 0.26 (26) | 37.11 ± 0.27 (26)  |
| 6        | 37.45 ± 0.42 (26) | 37.84 ± 0.27 (26) | 37.18 ± 0.28 (26)  |
| 7        | 37.54 ± 0.38 (26) | 37.92 ± 0.27 (26) | 37.26 ± 0.31 (26)  |
| 8        | 37.48 ± 0.51 (26) | 37.96 ± 0.37 (26) | 37.30 ± 0.28 (26)  |

The data are expressed as means ± s.d. Sample sizes (n) are all 26 as shown in this table.

Supplementary Table 6. Inactive  $T_b$  changes of a day during baseline, mating and late pregnancy.

| Time (h) | Baseline (n)      | Mating (n)        | Early pregnancy(n) | Late pregnancy (n) |
|----------|-------------------|-------------------|--------------------|--------------------|
| 10       | 36.77 ± 0.38 (26) | 37.27 ± 0.36 (26) | 37.52 ± 0.28 (26)  | 37.09 ± 0.28 (26)  |
| 11       | 36.53 ± 0.32 (26) | 37.09 ± 0.29 (26) | 37.38 ± 0.20 (26)  | 36.87 ± 0.23 (26)  |
| 12       | 36.42 ± 0.27 (26) | 37.00 ± 0.33 (26) | 37.37 ± 0.20 (26)  | 36.88 ± 0.21 (26)  |
| 13       | 36.52 ± 0.34 (26) | 37.06 ± 0.34 (26) | 37.42 ± 0.21 (26)  | 36.90 ± 0.27 (26)  |
| 14       | 36.51 ± 0.30 (26) | 37.06 ± 0.32 (26) | 37.38 ± 0.18 (26)  | 36.88 ± 0.23 (26)  |
| 15       | 36.48 ± 0.30 (26) | 37.06 ± 0.31 (26) | 37.36 ± 0.22 (26)  | 36.84 ± 0.21 (26)  |
| 16       | 36.53 ± 0.29 (26) | 37.07 ± 0.33 (26) | 37.38 ± 0.21 (26)  | 36.87 ± 0.24 (26)  |
| 17       | 36.63 ± 0.35 (26) | 37.17 ± 0.33 (26) | 37.45 ± 0.22 (26)  | 36.92 ± 0.29 (26)  |
| 18       | 36.78 ± 0.37 (26) | 37.26 ± 0.36 (26) | 37.46 ± 0.29 (26)  | 36.93 ± 0.29 (26)  |
| 19       | 37.01 ± 0.48 (26) | 37.34 ± 0.43 (25) | 37.51 ± 0.29 (24)  | 37.00 ± 0.32 (26)  |
| 20       | 37.13 ± 0.68 (16) | 37.37 ± 0.50 (18) | 37.52 ± 0.38 (17)  | 37.09 ± 0.36 (25)  |
| 21       | 37.11 ± 0.62 (18) | 37.47 ± 0.26 (22) | 37.49 ± 0.37 (24)  | 37.15 ± 0.27 (26)  |
| 22       | 37.11 ± 0.47 (18) | 37.36 ± 0.36 (26) | 37.46 ± 0.30 (24)  | 37.13 ± 0.26 (26)  |
| 23       | 37.11 ± 0.42 (20) | 37.40 ± 0.40 (24) | 37.42 ± 0.27 (26)  | 37.07 ± 0.24 (26)  |
| 0        | 36.87 ± 0.45 (24) | 37.37 ± 0.37 (24) | 37.42 ± 0.25 (23)  | 37.00 ± 0.28 (26)  |
| 1        | 36.87 ± 0.48 (24) | 37.27 ± 0.49 (21) | 37.39 ± 0.28 (22)  | 36.93 ± 0.27 (26)  |
| 2        | 36.77 ± 0.51 (26) | 37.26 ± 0.37 (17) | 37.38 ± 0.28 (25)  | 36.94 ± 0.22 (26)  |
| 3        | 36.73 ± 0.55 (25) | 37.24 ± 0.32 (26) | 37.37 ± 0.28 (26)  | 36.90 ± 0.26 (26)  |
| 4        | 36.55 ± 0.42 (26) | 37.18 ± 0.31 (26) | 37.33 ± 0.24 (26)  | 36.88 ± 0.28 (26)  |
| 5        | 36.49 ± 0.59 (25) | 37.18 ± 0.35 (26) | 37.38 ± 0.22 (26)  | 36.88 ± 0.27 (26)  |
| 6        | 36.57 ± 0.54 (26) | 37.19 ± 0.33 (24) | 37.35 ± 0.26 (26)  | 36.97 ± 0.35 (26)  |
| 7        | 36.66 ± 0.47 (26) | 37.30 ± 0.37 (22) | 37.47 ± 0.30 (22)  | 36.95 ± 0.35 (26)  |
| 8        | 36.77 ± 0.44 (26) | 37.29 ± 0.45 (19) | 37.43 ± 0.26 (23)  | 36.97 ± 0.30 (26)  |

The data are expressed as means ± s.d. Sample sizes (n) vary from 16 to 26 as shown in this table.
